# Supplementary material
Source: PubMed Central journal article supplement (PMC7483468)
Supplement: NIHMS1596680-supplement-1.pdf [file NIHMS1596680-supplement-1.pdf]

**SUPPLEMENTAL MATERIAL FOR:**

**PANNEXIN 1 CHANNELS IN RENIN-EXPRESSING CELLS INFLUENCE RENIN SECRETION AND BLOOD PRESSURE HOMEOSTASIS**

Leon J DeLalio<sup>1,2</sup>, Ester Masati<sup>1</sup>, Suresh Mendu<sup>2</sup>, Claire A Ruddiman<sup>1,2</sup>, Yang Yang<sup>1,3</sup>, Scott R Johnstone<sup>1</sup>, Jenna A. Milstein<sup>1</sup>, T.C. Stevenson Keller IV<sup>1,4</sup>, Rachel B Weaver<sup>1</sup>, Nick A. Guagliardo<sup>2</sup>, Angela K Best<sup>1</sup>, Kodi Ravichandran<sup>5</sup>, Douglas A Bayliss<sup>2</sup>, Maria Luisa S. Sequeira-Lopez<sup>6</sup>, Swapnil N. Sonkusare<sup>1,4</sup>, Xiaohong H. Shu<sup>3</sup>, Bimal Desai<sup>2</sup>, Paula Q. Barrett<sup>2</sup>, Thu H. Le<sup>7</sup>, R. Ariel Gomez<sup>6</sup>, and Brant E Isakson<sup>1,4\*</sup>

**Affiliations**

- <sup>1</sup> Robert M. Berne Cardiovascular Research Center, University of Virginia School of Medicine, Charlottesville, VA
- <sup>2</sup> Department of Pharmacology, University of Virginia School of Medicine, Charlottesville, VA
- <sup>3</sup> Department of Pharmacology, Dalian Medical University, Dalian 116044, China
- <sup>4</sup> Department of Molecular Physiology and Biophysics, University of Virginia School of Medicine, Charlottesville, VA
- <sup>5</sup> Department of Microbiology, Immunology, and Cancer, University of Virginia School of Medicine, Charlottesville, VA
- <sup>6</sup> Pediatric Center of Excellence in Nephrology, University of Virginia School of Medicine, Charlottesville, VA
- <sup>7</sup> Department of Medicine, Division of Nephrology, University of Rochester, Rochester NY

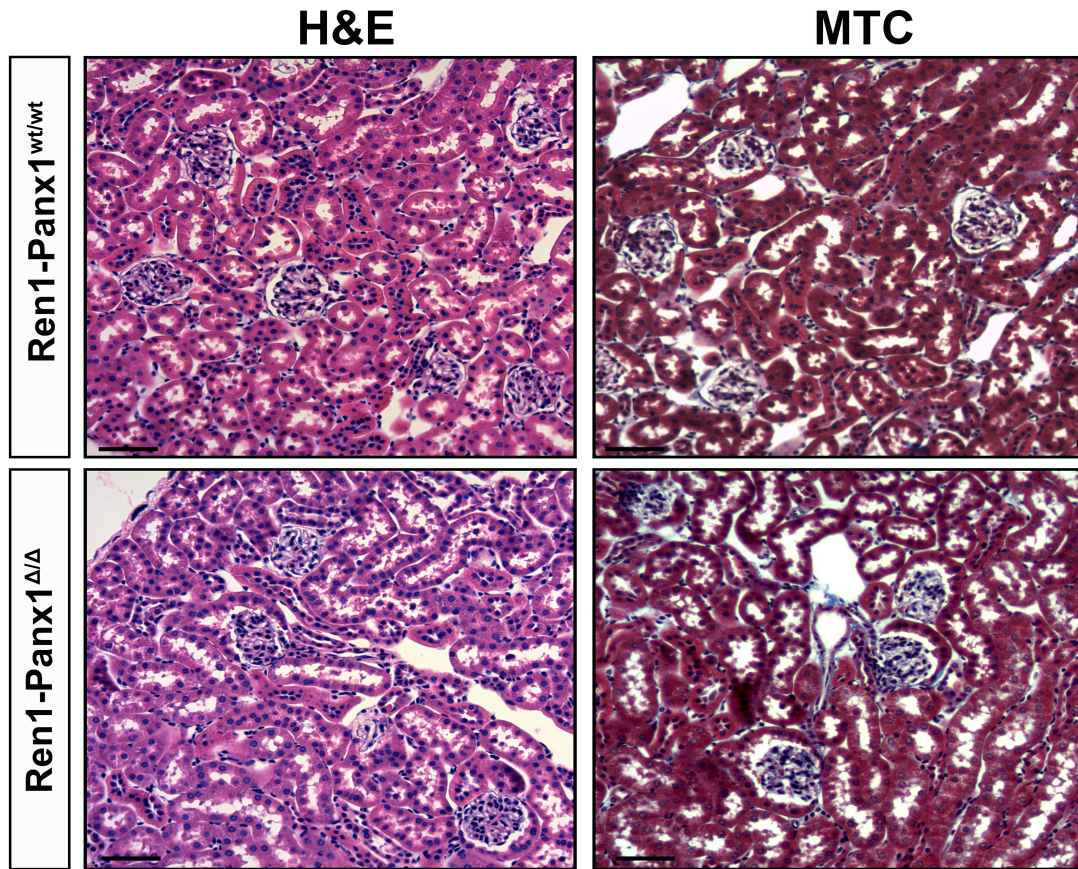

**Supplemental Figure 1: Ren1-Panx1<sup>Δ/Δ</sup> mice have normal renal tissue morphology.** Representative hematoxylin-eosin (H&E) and Masson's Trichrome (MTC) stain of kidney tissue. Glomerular size, distribution, and morphology are normal in Panx1 knockouts. No fibrosis or collagen deposition detected in the renal interstitium. Scale bar; 100 $\mu$ m.

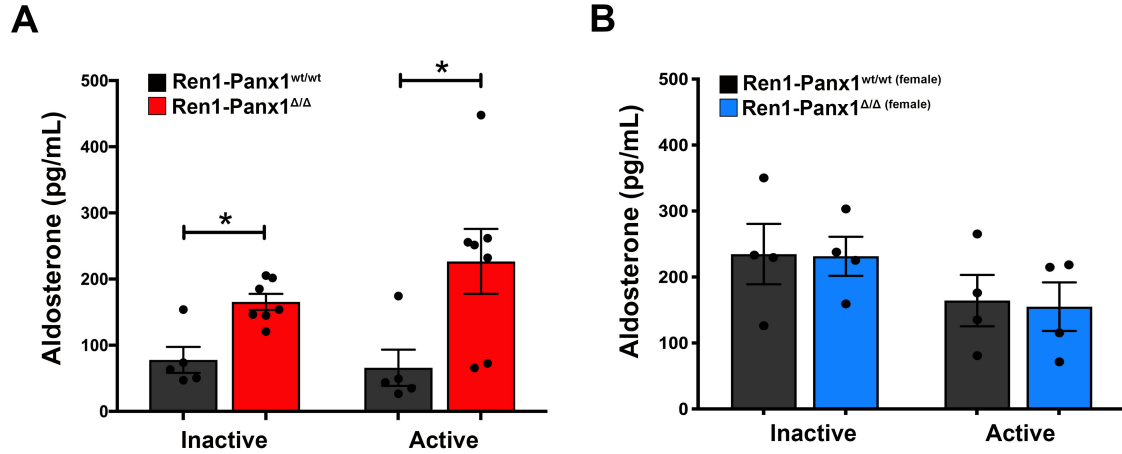

**Supplemental Figure 2: Plasma aldosterone levels are enhanced in male Ren1-Panx1 knockout mice.** Plasma aldosterone levels measured using RIA during the inactive and active period in **(A)** male Ren1-Panx1<sup>wt/wt</sup> control (N=5) and Ren1-Panx1<sup>Δ/Δ</sup> mice (N=7) and **(B)** female Ren1-Panx1<sup>wt/wt</sup> control (N=4) and Ren1-Panx1<sup>Δ/Δ</sup> mice (N=4). Data presented as mean ± s.e.m. Two-way ANOVA with repeated measures and Bonferroni post-hoc test performed for significance; \*p<0.05.

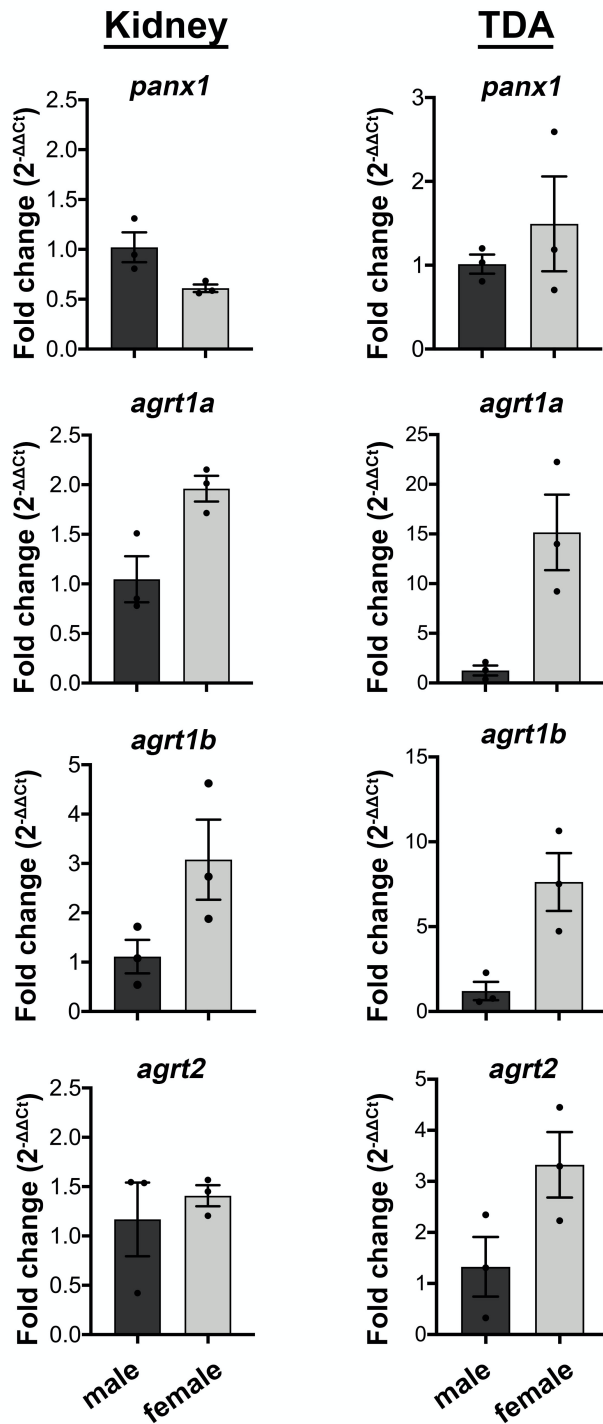

**Supplemental Figure 3: Male and female expression analysis of Panx1 and angiotensin-II receptors.** Expression analysis ( $2^{-\Delta\Delta C_t}$ ) of kidney cortex and thoracodorsal arteries (TDA) from male (n=3) and female (n=3) C57Bl6 mice. Data presented as mean fold change  $\pm$  s.e.m.

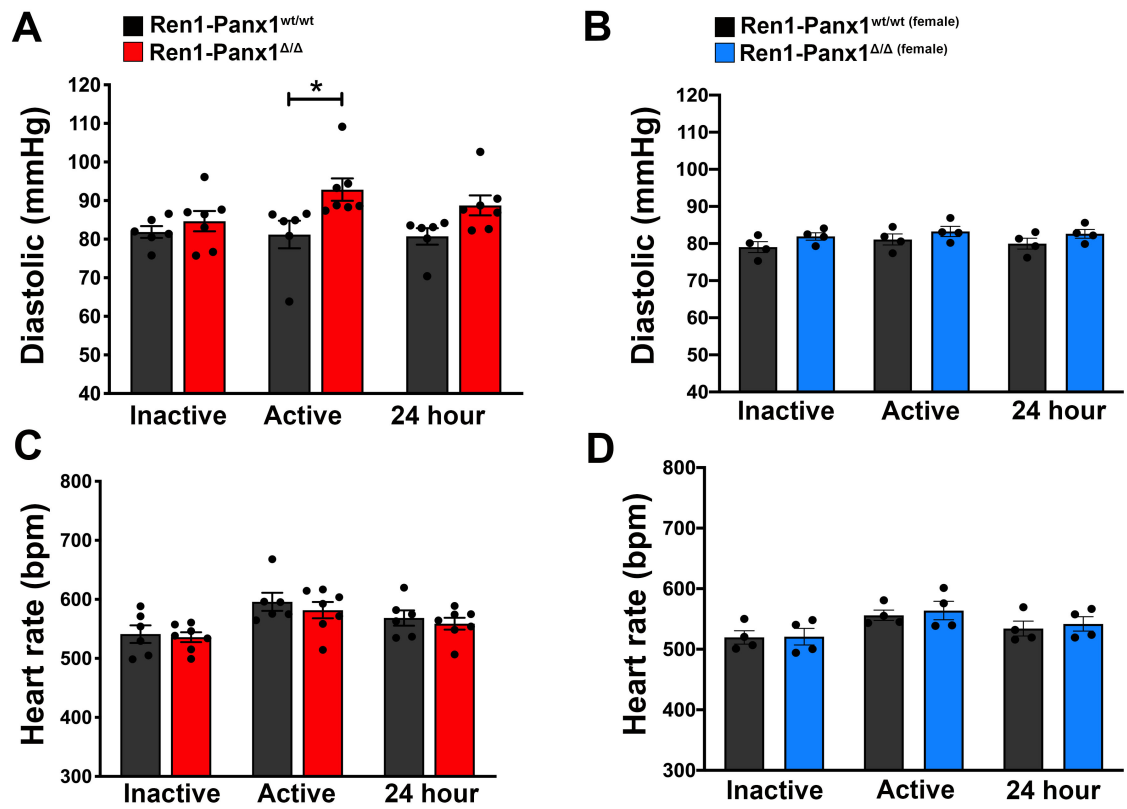

**Supplemental Figure 4: Diastolic blood pressure and heart rate from male and female Ren1-Panx1 knockout mice compared to controls. (A) Male diastolic pressure (B) Female diastolic pressure (C) Male heart rate (D) Female heart rate from Ren1-Panx1<sup>wt/wt</sup> control (male: N=6, female: N=4) and Ren1-Panx1<sup>Δ/Δ</sup> mice (male: N=7, female: N=4). Data are presented as mean ± s.e.m. Two-way ANOVA with repeated measures and Bonferroni post-hoc test performed for significance; \*p<0.05.**

**A**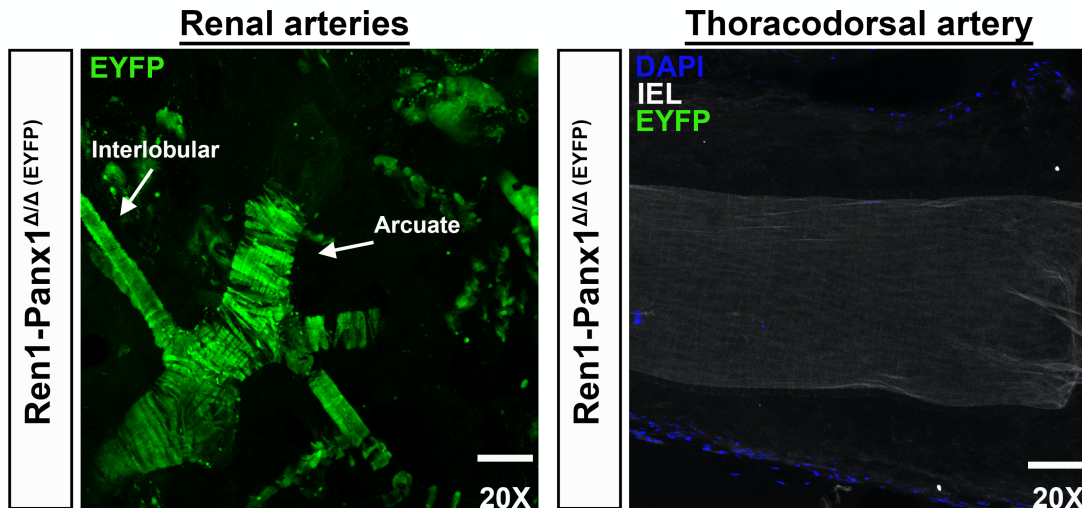**B**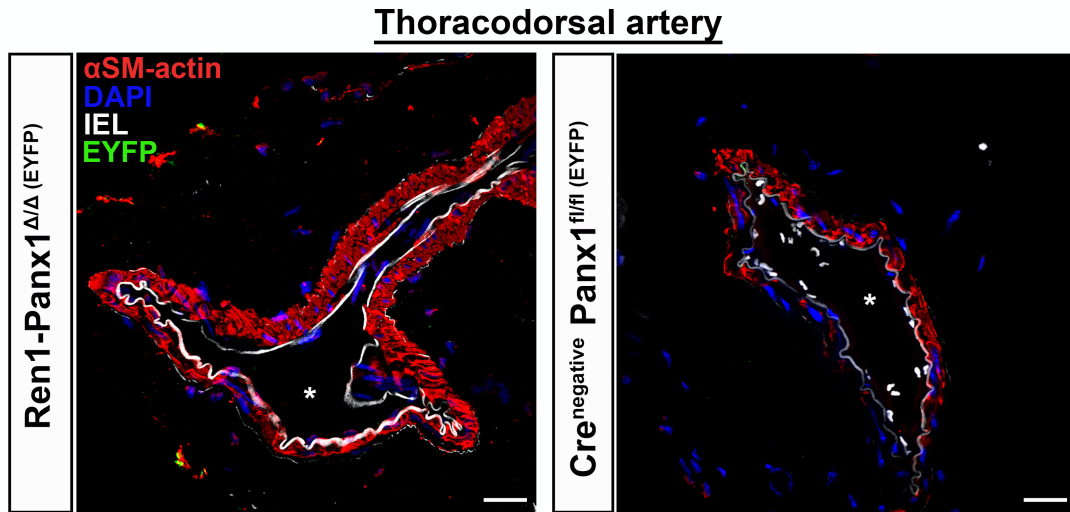

**Supplemental Figure 5:  $Ren1^d$ -Cre is active in reno-vascular smooth muscle cells and not peripheral vascular smooth muscle cells.** (A) Whole mount confocal images from  $Ren1-Panx1^{\Delta/\Delta}$  kidney slices and thoracodorsal arteries expressing the R26R-EYFP  $Gt(ROSA)26Sor^{tm1(EYFP)Cos}$  gene locus, EYFP (green), internal elastic lamina: IEL (white), DAPI (blue). (B) Immunofluorescence staining and confocal images of thoracodorsal arteries from EYFP expressing  $Ren1-Panx1^{\Delta/\Delta}$  mice or  $Ren1^d$ -Cre negative controls. EYFP (green), alpha smooth muscle acting (red), DAPI (blue), IEL (white); scale bar=20 $\mu$ m in each image. Asterisk\* denotes artery lumen.

**A**

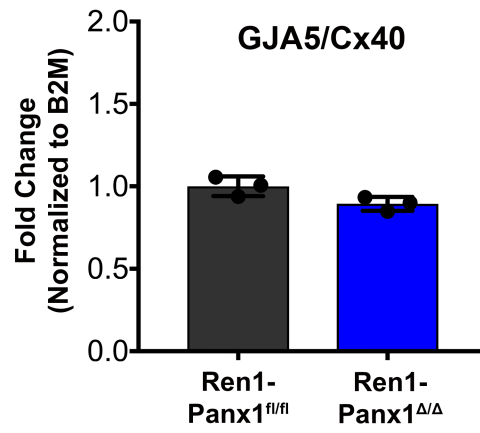

**Supplemental Figure 6: Loss of Panx1 does not alter Cx40 transcription.** (A) Cx40 mRNA expression fold change from kidney cortex of Ren1-Panx1<sup>wt/wt</sup> and Ren1-Panx1<sup>Δ/Δ</sup> mice; n=3. Data presented as mean fold change ± SD.

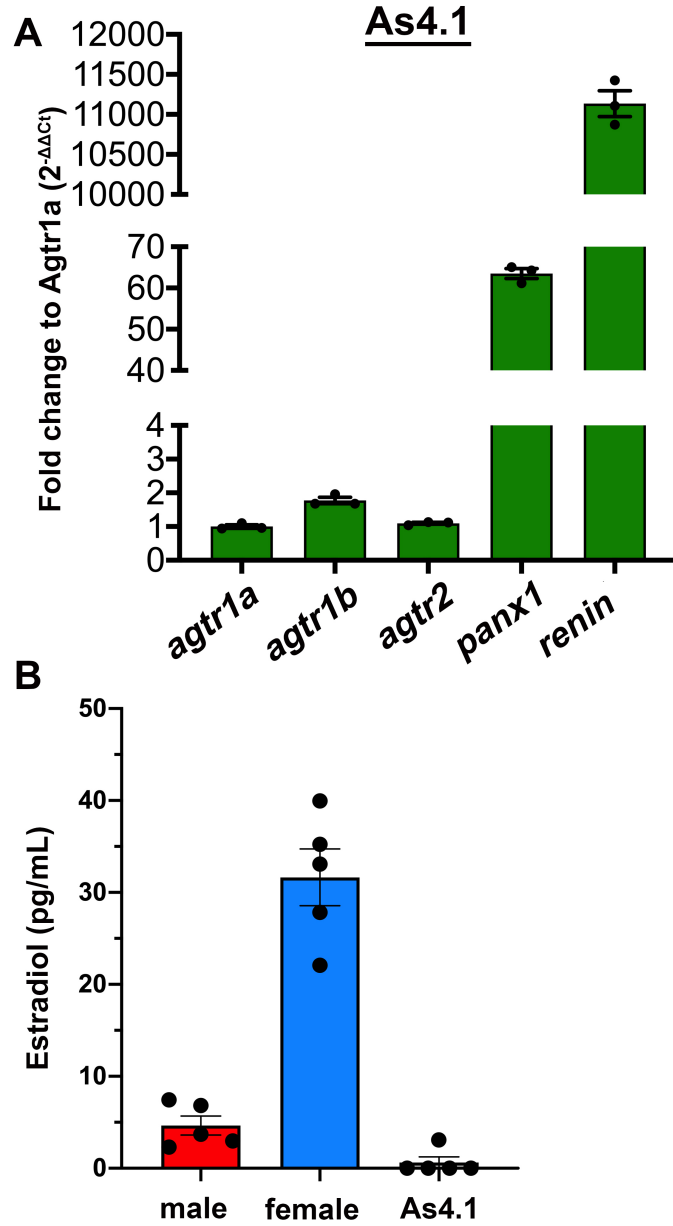

**Supplemental Figure 7: As4.1 expression analysis and estradiol levels. (A)** Expression analysis ( $2^{-\Delta\Delta C_t}$ ) of As4.1 for angiotensin-II receptor isoforms, Pannexin 1, and renin (n=3 experiments). Data presented as mean fold change  $\pm$  s.e.m from *agtr1a* levels. **(B)** Estradiol measured from As4.1 cells in comparison to male and female wild type mice (n=5 mice; n=5 experiments). Data presented as mean  $\pm$  s.e.m.
